# Supplementary material
Source: PubMed Central journal article supplement (PMC3993537)
Supplement: JVI.02823-13_zjv999098792so1.pdf [file JVI.02823-13_zjv999098792so1.pdf]

**Small noncoding RNAs in cells transformed by human T-cell leukemia virus type 1: a role for a tRNA fragment as a primer for reverse transcriptase**

Katia Ruggero, Alessandro Guffanti, Alberto Corradin, Varun Kumar Sharma, Gianluca De Bellis, Giorgio Corti, Angela Grassi, Paola Zanovello, Vincenzo Bronte, Vincenzo Ciminale, Donna M. D'Agostino

**DESCRIPTION OF SUPPLEMENTAL MATERIAL**

**Table S1. Primers used in RT-PCR.** Details for RT-PCR assays are provided in Materials and Methods.

**Table S2. tRFs.** The four libraries were analysed for reads with exact matches to 135 tRFs described by Lee et al. (2009) and for sequences with variations in the 5' and 3' ends (isoforms). The tRF-5 and tRF-3 isoforms were subjected to a BLAST search against the tRNA database after removing the 3'CCA triplet from the tRF-3 reads, and the tRF-1 isoforms were subjected to a BLAST search against the human genome. All listed isoforms yielded exact matches.

**Table S3. tRNA genes able to produce tRF-3019.** Shown are results of a BLAST search of the genomic tRNA database (<http://gtrnadb.ucsc.edu>) for human tRNA genes containing the sequence of tRF-3019 after removal of the 3'CCA. All listed genes yielded exact matches.

**Supplemental Table 1. Primer sequences.**

| Primer         | Sequence                               |
|----------------|----------------------------------------|
| U5-s           | CTCGGAGCCAGCGACAGC                     |
| Gag-as         | gaagcttGCCTAGGGAATAAAGGGGC             |
| Tail-U5-s      | agagcggattaacggcctaaCTCGGAGCCAGCGACAGC |
| Tail-s         | agagcggattaacggcctaa                   |
| tRF-3019 RNA   | AUCCCGGACGAGCCCCCA                     |
| tRF-3019 DNA   | ATCCCGGACGAGCCCCCA                     |
| miR-150 RNA    | UCUCCCAACCCUUGUACCAGUG                 |
| U5-as          | TGTGTACTAAATTTCTCTCCTG                 |
| RT7-tRF-3019   | aacgtattcaccgtgagtggTGGGGGC            |
| Short-tRF-3019 | cgtcagatgtccgagtagagATCCCGGACGAG       |
| RT8-tRF-3003   | aacgtattcaccgtgagtggTGGTGGAG           |
| Short-tRF-3003 | cgtcagatgtccgagtagagTCCCGGCACC         |
| PCR-tRF-s      | cgtcagatgtccgagtagag                   |
| PCR-tRF-as     | aacgtattcaccgtgagtgg                   |
| tRNA-Pro-s     | GGTCTAGGGGTATGATTCTCG                  |
| tRNA-Pro-as    | GCTCGTCCGGGATTTGAACC                   |
| tRNA-Ala-s     | GTGTAGCTCAGTGGTAGAGC                   |
| tRNA-Ala-as    | TGGAGGTGCCGGGGATTG                     |

Added tail sequences are indicated with lower case letters. Primer tRNA-Pro-as was described in **Imura Y, Shirai Y, Nojima T, Nakashima R, Yamagata H, Miyachi K, Yoshifuji H, Kawabata D, Ohmura K, Usui T, Fujii T, Mimori T.** 2012. NEFA/nucleobindin-2 is a target autoantigen of the anti-Wa antibody and is associated with transfer RNA. *Mod Rheumatol* **22**: 685-694. Primers were purchased from Sigma-Aldrich.

**Supplemental Table 2. tRFs**

|           | CD4 | Stim. CD4 | MT-2 | C91PL | Total no. reads |
|-----------|-----|-----------|------|-------|-----------------|
| tRF-1001  | 16  | 75        | 13   | 29    | 133             |
| isoform a | 41  | 46        | 7    | 19    | 113             |
| isoform b | 3   | 2         | 0    | 3     | 8               |
| isoform c | 0   | 1         | 0    | 1     | 2               |
| tRF-1002  | 0   | 0         | 0    | 2     | 2               |
| tRF-1003  | 0   | 2         | 0    | 4     | 6               |
| isoform a | 2   | 0         | 0    | 0     | 2               |
| tRF-1004  | 0   | 0         | 0    | 3     | 3               |
| isoform a | 0   | 0         | 0    | 1     | 1               |
| isoform b | 0   | 0         | 0    | 2     | 2               |
| tRF-1005  | 0   | 0         | 0    | 0     | 0               |
| isoform a | 0   | 0         | 1    | 1     | 2               |
| tRF-1006  | 0   | 0         | 0    | 6     | 6               |
| isoform a | 0   | 0         | 0    | 2     | 2               |
| tRF-1007  | 0   | 0         | 0    | 0     | 0               |
| isoform a | 0   | 0         | 0    | 2     | 2               |
| tRF-1008  | 0   | 0         | 0    | 2     | 2               |
| isoform a | 0   | 0         | 0    | 1     | 1               |
| isoform b | 0   | 0         | 0    | 4     | 4               |
| isoform c | 0   | 0         | 0    | 1     | 1               |
| tRF-1009  | 0   | 0         | 0    | 0     | 0               |
| tRF-1010  | 0   | 0         | 1    | 3     | 4               |
| isoform a | 0   | 0         | 1    | 0     | 1               |
| tRF-1011  | 0   | 0         | 0    | 0     | 0               |
| tRF-1012  | 0   | 0         | 0    | 0     | 0               |
| isoform a | 0   | 0         | 0    | 4     | 4               |
| tRF-1013  | 0   | 0         | 1    | 0     | 1               |

|           |                          |    |     |    |    |    |     |     |
|-----------|--------------------------|----|-----|----|----|----|-----|-----|
| tRF-1014  | tgactggacctttcttt        | 0  | 0   | 0  | 0  | 1  | 1   | 2   |
| isoform a | tgactggacctttcttt        | 0  | 0   | 0  | 0  | 1  | 1   | 1   |
| tRF-1015  | ctgtgctccggagtacctcgttt  | 0  | 0   | 0  | 0  | 2  | 2   | 2   |
| tRF-1016  | gctgcatagcaagccttt       | 0  | 0   | 0  | 0  | 1  | 1   | 1   |
| tRF-1017  | ttgccatgttaacgttt        | 0  | 0   | 1  | 1  | 1  | 2   | 2   |
| tRF-1018  | ccgtgtttccccacgcttt      | 0  | 0   | 0  | 0  | 0  | 0   | 0   |
| tRF-1019  | tcgtggctactgtttt         | 0  | 0   | 0  | 0  | 0  | 0   | 0   |
| tRF-1020  | tgagagcgtcggtttt         | 0  | 0   | 0  | 0  | 1  | 1   | 1   |
| tRF-1021  | aagagagtcgcttttt         | 0  | 0   | 0  | 0  | 1  | 1   | 1   |
| tRF-1022  | ggaggggagaaggtttt        | 0  | 0   | 0  | 0  | 0  | 0   | 0   |
| tRF-3001  | atcccaccgctgccacca       | 11 | 57  | 2  | 11 | 11 | 81  | 102 |
| isoform a | aatcccaccgctgccacca      | 1  | 4   | 0  | 0  | 0  | 5   | 5   |
| isoform b | tcgaatcccaccgctgccacca   | 2  | 8   | 0  | 0  | 0  | 10  | 10  |
| isoform c | gttcgaatcccaccgctgccacca | 0  | 0   | 1  | 0  | 0  | 1   | 1   |
| isoform d | tcccaccgctgccacca        | 0  | 1   | 0  | 4  | 4  | 5   | 5   |
| tRF-3002  | accctgctcgctgcgcca       | 16 | 39  | 1  | 9  | 9  | 65  | 74  |
| isoform a | tcgaaccctgctcgctgcgcca   | 0  | 1   | 1  | 1  | 1  | 3   | 3   |
| isoform b | ccctgctcgctgcgcca        | 0  | 2   | 0  | 4  | 4  | 6   | 6   |
| tRF-3003  | tccccggcacctccacca       | 31 | 120 | 7  | 37 | 37 | 195 | 214 |
| isoform a | atccccggcacctccacca      | 1  | 9   | 0  | 0  | 0  | 10  | 10  |
| isoform b | tcaatccccggcacctccacca   | 1  | 1   | 0  | 5  | 5  | 7   | 7   |
| isoform c | tcgatccccggcacctccacca   | 0  | 1   | 0  | 1  | 1  | 2   | 2   |
| tRF-3004  | tccccggcatctccacca       | 21 | 49  | 5  | 83 | 83 | 158 | 185 |
| isoform a | atccccggcatctccacca      | 1  | 6   | 0  | 0  | 0  | 7   | 7   |
| isoform b | cgatccccggcatctccacca    | 0  | 0   | 0  | 1  | 1  | 1   | 1   |
| isoform c | tcgatccccggcatctccacca   | 6  | 6   | 0  | 6  | 6  | 18  | 18  |
| isoform d | tcaatccccggcatctccacca   | 0  | 0   | 0  | 1  | 1  | 1   | 1   |
| tRF-3005  | atcctgcccgactacgcca      | 21 | 69  | 10 | 8  | 8  | 108 | 141 |
| isoform a | aatcctgcccgactacgcca     | 0  | 0   | 1  | 0  | 0  | 1   | 1   |

|           |                          |   |    |   |    |   |   |    |    |
|-----------|--------------------------|---|----|---|----|---|---|----|----|
| isoform b | gaatcctgcccactacgcca     | 0 | 0  | 3 | 0  | 0 | 3 | 0  | 3  |
| isoform c | tcgaatcctgcccactacgcca   | 7 | 5  | 2 | 7  | 0 | 2 | 7  | 21 |
| isoform d | gttcgaatcctgcccactacgcca | 0 | 0  | 1 | 0  | 0 | 1 | 0  | 1  |
| isoform e | tcctgcccactacgcca        | 0 | 3  | 0 | 4  | 0 | 0 | 4  | 7  |
| tRF-3006  | tcgattccccggcccactacgcca | 0 | 11 | 0 | 15 | 0 | 0 | 15 | 26 |
| tRF-3007  | tcgattccccggcccactacgcca | 1 | 13 | 1 | 8  | 0 | 1 | 8  | 23 |
| tRF-3008  | gtcccaccagagtcgcca       | 2 | 19 | 0 | 3  | 0 | 0 | 3  | 24 |
| isoform a | agtcccaccagagtcgcca      | 0 | 4  | 0 | 2  | 0 | 0 | 2  | 6  |
| tRF-3009  | acccactcctggtacca        | 6 | 24 | 1 | 29 | 0 | 1 | 29 | 60 |
| isoform a | aacccactcctggtacca       | 0 | 1  | 0 | 0  | 0 | 0 | 0  | 1  |
| isoform b | tcgaacccactcctggtacca    | 0 | 2  | 0 | 1  | 0 | 0 | 1  | 3  |
| isoform c | ccccactcctggtacca        | 0 | 1  | 0 | 0  | 0 | 0 | 0  | 1  |
| tRF-3010  | gtcccttcgtggtcgcca       | 3 | 8  | 1 | 2  | 0 | 1 | 2  | 14 |
| isoform a | agtccttcgtggtcgcca       | 3 | 7  | 5 | 1  | 0 | 5 | 1  | 16 |
| isoform b | gagtccttcgtggtcgcca      | 0 | 0  | 1 | 0  | 0 | 1 | 0  | 1  |
| isoform c | tcgagtccttcgtggtcgcca    | 2 | 0  | 2 | 0  | 0 | 2 | 0  | 4  |
| tRF-3011  | aaccgggcggaaacacca       | 1 | 0  | 0 | 5  | 0 | 0 | 5  | 6  |
| isoform a | tcgaaacccgggcggaaacacca  | 2 | 1  | 1 | 1  | 0 | 1 | 1  | 5  |
| isoform b | accgggcggaaacacca        | 0 | 0  | 2 | 8  | 0 | 2 | 8  | 10 |
| isoform c | ccgggcggaaacacca         | 0 | 0  | 0 | 1  | 0 | 0 | 1  | 1  |
| tRF-3012  | agtccttcctggtcgcca       | 1 | 14 | 4 | 2  | 0 | 4 | 2  | 21 |
| isoform a | gagtccttcctggtcgcca      | 0 | 0  | 1 | 0  | 0 | 1 | 0  | 1  |
| isoform b | cgagtccttcctggtcgcca     | 0 | 1  | 1 | 0  | 0 | 1 | 0  | 2  |
| isoform c | tcgagtccttcctggtcgcca    | 0 | 1  | 0 | 0  | 0 | 0 | 0  | 1  |
| isoform d | gtcccatctgggtcgcca       | 0 | 1  | 0 | 1  | 0 | 0 | 1  | 2  |
| tRF-3013  | tcgagcccacccaggacgcca    | 0 | 2  | 0 | 2  | 0 | 0 | 2  | 4  |
| tRF-3014  | gtcctgcccgggtcgcca       | 6 | 11 | 1 | 1  | 0 | 1 | 1  | 19 |
| isoform a | agtcctgcccgggtcgcca      | 3 | 1  | 0 | 0  | 0 | 0 | 0  | 4  |
| isoform b | cgagtcctgcccgggtcgcca    | 0 | 1  | 0 | 0  | 0 | 0 | 0  | 1  |

|           |                         |    |    |   |   |    |     |
|-----------|-------------------------|----|----|---|---|----|-----|
| isoform c | tcgagtcctgccgggtcgcca   | 2  | 0  | 0 | 0 | 1  | 3   |
| tRF-3015  | tcaagtcctgttcggggcgcca  | 1  | 2  | 0 | 0 | 0  | 3   |
| tRF-3016  | tcgaatcccactcctgacacca  | 2  | 5  | 1 | 1 | 6  | 14  |
| isoform a | atcgaatcccactcctgacacca | 0  | 1  | 0 | 0 | 0  | 1   |
| isoform b | cgaatcccactcctgacacca   | 0  | 1  | 0 | 0 | 0  | 1   |
| isoform c | atcccactcctgacacca      | 1  | 20 | 1 | 1 | 14 | 36  |
| isoform d | tcccactcctgacacca       | 0  | 0  | 0 | 0 | 4  | 4   |
| tRF-3017  | tcgaatcccactcctcgcgcca  | 2  | 5  | 0 | 0 | 4  | 11  |
| tRF-3018  | tcgattcccggccaatgacacca | 9  | 29 | 0 | 0 | 13 | 51  |
| tRF-3019  | atcccggacgagccccca      | 12 | 63 | 3 | 3 | 24 | 102 |
| isoform a | aatcccggacgagccccca     | 0  | 5  | 0 | 0 | 2  | 7   |
| isoform b | tcaaatcccggacgagccccca  | 0  | 0  | 0 | 0 | 2  | 2   |
| isoform c | ttcaaatcccggacgagccccca | 0  | 0  | 0 | 0 | 1  | 1   |
| isoform d | tcccggacgagccccca       | 0  | 3  | 0 | 0 | 7  | 10  |
| tRF-3020  | atcccaccagagtcgcca      | 0  | 60 | 1 | 1 | 15 | 76  |
| isoform a | aatcccaccagagtcgcca     | 0  | 1  | 0 | 0 | 3  | 4   |
| isoform b | tcgaatcccaccagagtcgcca  | 0  | 1  | 0 | 0 | 0  | 1   |
| isoform c | tcccaccagagtcgcca       | 0  | 3  | 0 | 0 | 1  | 4   |
| tRF-3021  | accccacttctggtacca      | 0  | 11 | 0 | 0 | 5  | 16  |
| tRF-3022  | atcccaccactgccacca      | 0  | 3  | 0 | 0 | 3  | 6   |
| tRF-3023  | tgcccgcgcatcctccacca    | 5  | 47 | 2 | 2 | 2  | 56  |
| isoform a | atgcccgcatecctccacca    | 6  | 8  | 3 | 3 | 0  | 17  |
| isoform b | tcgatgcccgcatecctccacca | 2  | 2  | 0 | 0 | 0  | 4   |
| isoform c | gcccgcatecctccacca      | 0  | 0  | 0 | 0 | 7  | 7   |
| tRF-3024  | tcgatccccggcatctcca     | 0  | 0  | 0 | 0 | 0  | 0   |
| isoform a | tcgatccccggcatctccacca  | 6  | 6  | 0 | 0 | 6  | 18  |
| tRF-3025  | tcgaatcccagtagagcctcca  | 0  | 1  | 1 | 1 | 0  | 2   |
| tRF-3026  | tcgaatcccacttctgacacca  | 0  | 4  | 1 | 1 | 4  | 9   |
| tRF-3027  | ccccggctcctccacca       | 0  | 3  | 0 | 0 | 0  | 3   |

|           |                          |   |    |   |    |   |   |    |    |
|-----------|--------------------------|---|----|---|----|---|---|----|----|
| tRF-3028  | atcccttcgtaggtgcca       | 1 | 1  | 1 | 1  | 0 | 0 | 3  | 4  |
| isoform a | tcgaatccccttcgtaggtgcca  | 0 | 1  | 0 | 0  | 0 | 0 | 1  |    |
| tRF-3029  | tccccagtagcctccacca      | 0 | 16 | 2 | 62 |   |   | 80 | 89 |
| isoform a | atccccagtagcctccacca     | 0 | 1  | 1 | 3  |   |   | 5  |    |
| isoform b | tcgatccccagtagcctccacca  | 0 | 1  | 1 | 2  |   |   | 4  |    |
| tRF-3030  | atcacgtcggggtcacca       | 0 | 9  | 0 | 1  |   |   | 10 | 18 |
| isoform a | caaatcacgtcggggtcacca    | 1 | 0  | 0 | 0  |   |   | 1  |    |
| isoform b | tcgaatcacgtcggggtcacca   | 1 | 0  | 0 | 0  |   |   | 1  |    |
| isoform c | tcacgtcggggtcacca        | 0 | 1  | 0 | 5  |   |   | 6  |    |
| tRF-3031  | tcgactccccggtgtgggaacc   | 0 | 0  | 0 | 0  |   |   | 0  | 4  |
| isoform a | tcgactccccggtgtgggaacc   | 2 | 0  | 0 | 2  |   |   | 4  |    |
| tRF-3032  | atccccaccttcgtagcga      | 1 | 0  | 0 | 3  |   |   | 4  | 4  |
| tRF-3033  | tcgattccccgggcggcacc     | 1 | 2  | 0 | 2  |   |   | 5  | 5  |
| tRF-3034  | tccccgggttcggcacc        | 0 | 13 | 0 | 8  |   |   | 21 | 24 |
| isoform a | atccccgggttcggcacc       | 0 | 1  | 0 | 1  |   |   | 2  |    |
| isoform b | cgatccccgggttcggcacc     | 1 | 0  | 0 | 0  |   |   | 1  |    |
| tRF-3035  | atccccggacgagcccc        | 1 | 1  | 0 | 0  |   |   | 2  | 4  |
| isoform a | tcaaatccccggacgagcccc    | 0 | 1  | 0 | 1  |   |   | 2  |    |
| tRF-3036  | tccccgacacctccacca       | 0 | 1  | 0 | 2  |   |   | 3  | 3  |
| tRF-3037  | acccgtagcctccca          | 0 | 5  | 0 | 0  |   |   | 5  | 6  |
| isoform a | tcgaacccccgtagcctccca    | 0 | 1  | 0 | 0  |   |   | 1  |    |
| tRF-3038  | atccccaccgtagcacc        | 0 | 0  | 0 | 0  |   |   | 0  |    |
| tRF-3039  | tcaaatccccggtagcctccca   | 0 | 1  | 0 | 0  |   |   | 1  | 1  |
| tRF-3040  | tcgaatccccaggggcctccca   | 2 | 1  | 0 | 1  |   |   | 4  | 4  |
| tRF-3041  | tcgaatccccagtagcagggcacc | 0 | 1  | 0 | 0  |   |   | 1  | 1  |
| tRF-3042  | tccccgtagtagcagggcacc    | 0 | 2  | 0 | 4  |   |   | 6  | 6  |
| tRF-3043  | tccccagtagcctccacca      | 0 | 1  | 0 | 0  |   |   | 1  | 3  |
| isoform a | atccccagtagcctccacca     | 0 | 1  | 0 | 1  |   |   | 2  |    |
| tRF-3044  | tcgaatccttagtagcacc      | 0 | 1  | 0 | 0  |   |   | 1  | 1  |

|           |                         |   |    |   |   |   |   |   |   |    |
|-----------|-------------------------|---|----|---|---|---|---|---|---|----|
| tRF-3045  | tcgatccccggcacctcca     | 0 | 0  | 0 | 0 | 0 | 0 | 0 | 0 | 2  |
| isoform a | tcgatccccggcacctcca     | 0 | 1  | 0 | 0 | 1 | 0 | 0 | 0 | 2  |
| tRF-3046  | tcgattccagctcgaaggacca  | 0 | 0  | 0 | 0 | 0 | 0 | 0 | 0 | 0  |
| tRF-3047  | acccactctcggtagca       | 0 | 0  | 0 | 0 | 0 | 0 | 0 | 0 | 0  |
| tRF-3048  | agtcaccacctgggtagca     | 0 | 1  | 0 | 0 | 1 | 0 | 0 | 1 | 8  |
| isoform a | cgagtcccacctgggtagca    | 0 | 1  | 0 | 0 | 0 | 0 | 0 | 0 | 1  |
| isoform b | gtcccacctgggtagca       | 0 | 0  | 0 | 0 | 0 | 0 | 0 | 5 | 5  |
| tRF-3049  | tcgaaaccatcctctgtagca   | 0 | 1  | 0 | 0 | 0 | 0 | 0 | 0 | 2  |
| isoform a | atcgaaaccatcctctgtagca  | 0 | 0  | 1 | 0 | 1 | 0 | 0 | 0 | 1  |
| tRF-3050  | atcctgctcacagcgcca      | 0 | 2  | 3 | 3 | 3 | 0 | 0 | 0 | 14 |
| isoform a | tcctgctcacagcgcca       | 0 | 0  | 0 | 0 | 6 | 0 | 0 | 0 | 6  |
| tRF-3051  | gtcacgtcgggtagca        | 0 | 3  | 1 | 0 | 0 | 0 | 0 | 0 | 4  |
| isoform a | agtcacgtcgggtagca       | 0 | 1  | 0 | 0 | 0 | 0 | 0 | 0 | 1  |
| isoform b | tcaagtcacgtcgggtagca    | 4 | 1  | 0 | 0 | 0 | 0 | 0 | 0 | 5  |
| tRF-3052  | tcgatccccgtacgggtagca   | 0 | 0  | 0 | 0 | 0 | 0 | 0 | 0 | 0  |
| tRF-3053  | tcgattccccgacgggtagca   | 0 | 2  | 0 | 2 | 2 | 0 | 0 | 0 | 4  |
| tRF-3054  | atcccaccctcgtcgcca      | 0 | 3  | 0 | 0 | 0 | 0 | 0 | 0 | 3  |
| tRF-3055  | actcccggtgtgggtagca     | 0 | 0  | 0 | 0 | 3 | 0 | 0 | 0 | 3  |
| isoform a | tcgactccccggtgtgggtagca | 2 | 0  | 0 | 0 | 2 | 0 | 0 | 0 | 4  |
| isoform b | ctcccggtgtgggtagca      | 2 | 12 | 0 | 0 | 3 | 0 | 0 | 0 | 17 |
| tRF-3056  | gagcctcacacgggtagca     | 0 | 0  | 0 | 0 | 0 | 0 | 0 | 0 | 0  |
| tRF-3057  | tcgattccggctcgaaggtagca | 0 | 2  | 1 | 0 | 0 | 0 | 0 | 0 | 3  |
| tRF-3058  | tcgattccccggccaatgcacc  | 0 | 0  | 0 | 0 | 0 | 0 | 0 | 0 | 0  |
| tRF-3059  | tcgaatcacgtcgggtagca    | 1 | 0  | 0 | 0 | 0 | 0 | 0 | 0 | 1  |
| tRF-3060  | tcgaatcccagcaggcctcca   | 0 | 0  | 0 | 0 | 0 | 0 | 0 | 0 | 0  |
| tRF-3061  | tcgactcctggctggctcgcc   | 0 | 0  | 0 | 0 | 0 | 0 | 0 | 0 | 0  |
| isoform a | tcgactcctggctggctcgcca  | 0 | 1  | 0 | 0 | 1 | 0 | 0 | 0 | 2  |
| tRF-3062  | tccccggcggaacaccca      | 0 | 0  | 0 | 0 | 0 | 0 | 0 | 0 | 3  |
| isoform a | tcgatccccggcggaacaccca  | 0 | 1  | 0 | 0 | 0 | 0 | 0 | 0 | 4  |



|           |                           |   |   |    |   |   |    |    |   |
|-----------|---------------------------|---|---|----|---|---|----|----|---|
| tRF-3063  | accgggcagaaagcacca        | 0 | 0 | 0  | 0 | 0 | 0  | 0  | 0 |
| tRF-3064  | atccctccgtgggttacca       | 0 | 2 | 0  | 0 | 6 | 9  | 8  | 0 |
| isoform a | tcgatccctccgtggttacca     | 0 | 1 | 0  | 0 | 0 | 1  | 1  | 0 |
| tRF-3065  | gtccctgtccaggcgcca        | 0 | 0 | 0  | 0 | 0 | 0  | 0  | 0 |
| tRF-3066  | tctcgctgggcctcca          | 0 | 1 | 0  | 0 | 0 | 1  | 1  | 0 |
| tRF-3067  | tcgaaaccgggcggaacacc      | 0 | 0 | 0  | 0 | 0 | 5  | 0  | 0 |
| isoform a | tcgaaaccgggcggaacacca     | 2 | 1 | 1  | 1 | 1 | 5  | 5  | 0 |
| tRF-3068  | tcctcacacggggcacca        | 3 | 5 | 0  | 0 | 0 | 9  | 8  | 0 |
| isoform a | tcgatcctcacacggggcacca    | 0 | 1 | 0  | 0 | 0 | 1  | 1  | 0 |
| tRF-3069  | tcgactcctggctggctcgcca    | 0 | 1 | 0  | 0 | 1 | 2  | 2  | 0 |
| tRF-3070  | tcgagccccagtggaaccacca    | 0 | 0 | 0  | 0 | 0 | 0  | 0  | 0 |
| tRF-3071  | tcgactcccgggatggaaacca    | 0 | 0 | 0  | 0 | 0 | 0  | 0  | 0 |
| tRF-3072  | tcaaatctcggtggaacctcca    | 1 | 0 | 0  | 0 | 0 | 1  | 1  | 0 |
| tRF-3073  | tcgaatcctgctcacagcgcca    | 0 | 0 | 0  | 0 | 0 | 0  | 0  | 0 |
| tRF-3074  | agtcaccacccgggtacca       | 0 | 0 | 0  | 0 | 2 | 2  | 2  | 0 |
| tRF-3075  | atctcggtagggacctcca       | 1 | 2 | 0  | 0 | 1 | 10 | 4  | 0 |
| isoform a | tcaaatctcggtagggacctcca   | 0 | 2 | 0  | 0 | 1 | 3  | 3  | 0 |
| isoform b | tctcggtagggacctcca        | 0 | 0 | 0  | 0 | 3 | 3  | 3  | 0 |
| tRF-3076  | ggtcacctgtccaggcgcca      | 0 | 0 | 0  | 0 | 0 | 0  | 0  | 0 |
| tRF-3077  | tccccggcacctccacc         | 0 | 0 | 0  | 0 | 0 | 2  | 0  | 0 |
| isoform a | atccccggcacctccacc        | 0 | 1 | 0  | 0 | 0 | 1  | 1  | 0 |
| isoform b | aatccccggcacctccacc       | 1 | 0 | 0  | 0 | 0 | 1  | 1  | 0 |
| tRF-5001  | gacgagtgggcccgagtgg       | 0 | 1 | 3  | 2 | 2 | 23 | 6  | 0 |
| isoform a | gacgagtgggcccgagtggttaa   | 0 | 1 | 5  | 0 | 0 | 6  | 6  | 0 |
| isoform b | gacgagtgggcccgagtggttaag  | 0 | 0 | 9  | 0 | 0 | 9  | 9  | 0 |
| isoform c | gacgagtgggcccgagtggttaagg | 0 | 0 | 2  | 0 | 0 | 2  | 2  | 0 |
| tRF-5002  | tcctcctgggtctagtggtta     | 0 | 1 | 4  | 0 | 0 | 37 | 5  | 0 |
| isoform a | tcctcctgggtctagtggttag    | 0 | 0 | 11 | 0 | 0 | 11 | 11 | 0 |
| isoform b | tcctcctgggtctagtggttagg   | 0 | 0 | 16 | 0 | 0 | 16 | 16 | 0 |



|           |                          |   |   |   |   |   |   |   |   |   |
|-----------|--------------------------|---|---|---|---|---|---|---|---|---|
| tRF-5012  | gccccgatagctcagtcg       | 0 | 0 | 0 | 0 | 0 | 0 | 0 | 0 | 4 |
| isoform a | gccccgatagctcagtcgg      | 0 | 1 | 0 | 0 | 2 |   |   |   | 3 |
| isoform b | gccccgatagctcagtcggtag   | 0 | 0 | 1 | 0 | 0 |   |   |   | 1 |
| tRF-5013  | gtcaggatggcccagcggctc    | 0 | 0 | 0 | 0 | 0 |   |   |   | 1 |
| isoform a | gtcaggatggcccagcggctct   | 0 | 0 | 0 | 0 | 1 |   |   |   | 1 |
| tRF-5014  | gctgtgatggccgagtg        | 0 | 0 | 0 | 0 | 0 |   |   |   | 0 |
| tRF-5015  | gtagtcgtggccgagtggtta    | 0 | 0 | 0 | 0 | 0 |   |   |   | 7 |
| isoform a | gtagtcgtggccgagtggttaa   | 0 | 0 | 1 | 0 | 0 |   |   |   | 1 |
| isoform b | gtagtcgtggccgagtggttaag  | 0 | 0 | 3 | 1 |   |   |   |   | 4 |
| isoform c | gtagtcgtggccgagtggttaagg | 0 | 0 | 2 | 0 |   |   |   |   | 2 |
| tRF-5016  | accaggatggcccagtggtta    | 0 | 0 | 0 | 0 | 0 |   |   |   | 1 |
| isoform a | ccaggatggcccagtggttaag   | 0 | 0 | 1 | 0 |   |   |   |   | 1 |
| tRF-5017  | gtcacggtggccgagtg        | 0 | 0 | 1 | 0 |   |   |   |   | 3 |
| isoform a | gtcacggtggccgagtggttaa   | 0 | 0 | 1 | 0 |   |   |   |   | 1 |
| isoform b | gtcacggtggccgagtggttaag  | 0 | 0 | 1 | 0 |   |   |   |   | 1 |
| tRF-5018  | gggccagtgccgcaatgg       | 0 | 0 | 1 | 0 |   |   |   |   | 1 |
| tRF-5019  | gcagcgatggccgagtg        | 0 | 0 | 0 | 2 |   |   |   |   | 2 |
| tRF-5020  | tccctggtggtctagtggtta    | 0 | 0 | 2 | 1 |   |   |   |   | 3 |
| tRF-5021  | tcccacatggtctagcggtagg   | 0 | 0 | 0 | 0 |   |   |   |   | 0 |
| tRF-5022  | gtttccgtagtgtagtggtta    | 0 | 0 | 0 | 0 |   |   |   |   | 1 |
| isoform a | gtttccgtagtgtagtggttatca | 0 | 0 | 1 | 0 |   |   |   |   | 1 |
| tRF-5023  | ggtagtggtggccgagcggctc   | 0 | 0 | 0 | 0 |   |   |   |   | 0 |
| tRF-5024  | gccccgtagctcagtcg        | 0 | 0 | 0 | 0 |   |   |   |   | 0 |
| tRF-5025  | ggcgcggtggccaaagtgg      | 0 | 0 | 0 | 0 |   |   |   |   | 2 |
| isoform a | ggcgcggtggccaaagtggta    | 1 | 0 | 0 | 0 |   |   |   |   | 1 |
| isoform b | ggcgcggtggccaaagtggtaagg | 0 | 0 | 1 | 0 |   |   |   |   | 1 |
| tRF-5026  | gcctgggtagctcagtcgg      | 0 | 0 | 0 | 0 |   |   |   |   | 1 |
| isoform a | gcctgggtagctcagtcgg      | 0 | 0 | 0 | 1 |   |   |   |   | 1 |
| tRF-5027  | accagaatggccgagtggttaa   | 0 | 0 | 0 | 0 |   |   |   |   | 0 |

|           |                           |     |      |     |     |      |     |      |      |      |
|-----------|---------------------------|-----|------|-----|-----|------|-----|------|------|------|
| tRF-5028  | agcagagtggcgagcgga        | 0   | 0    | 0   | 0   | 0    | 0   | 0    | 0    | 0    |
| tRF-5029  | gtcaggatggccgagtggtc      | 0   | 0    | 0   | 0   | 0    | 0   | 0    | 0    | 1    |
| isoform a | gtcaggatggccgagtggtctaag  | 0   | 0    | 0   | 1   | 0    | 0   | 0    | 0    | 1    |
| tRF-5030  | gccgtgacgtatagtggtta      | 0   | 0    | 0   | 0   | 0    | 0   | 0    | 0    | 0    |
| tRF-5031  | tcctcgttagtatagtg         | 0   | 0    | 0   | 0   | 0    | 0   | 0    | 0    | 8    |
| isoform a | tcctcgttagtatagtg         | 1   | 1    | 0   | 0   | 0    | 0   | 0    | 0    | 2    |
| isoform b | tcctcgttagtatagtggt       | 0   | 0    | 0   | 0   | 0    | 4   | 0    | 0    | 4    |
| isoform c | tcctcgttagtatagtggtgagt   | 0   | 0    | 0   | 1   | 0    | 0   | 0    | 0    | 1    |
| isoform d | tcctcgttagtatagtggtgagta  | 0   | 0    | 0   | 0   | 0    | 1   | 0    | 0    | 1    |
| tRF-5032  | gacctcgtggcgcaatgg        | 0   | 1    | 0   | 0   | 3    | 0   | 0    | 0    | 4    |
| tRF-5033  | gccccgatgacccctcagtg      | 0   | 0    | 0   | 0   | 0    | 0   | 0    | 0    | 1    |
| isoform a | gccccgatgacccctcagtggt    | 0   | 0    | 0   | 0   | 1    | 0   | 0    | 0    | 1    |
| tRF-5034  | tcccatatggtctagcgggta     | 0   | 0    | 0   | 0   | 0    | 0   | 0    | 0    | 0    |
| tRF-5035  | gggggtatagctcagtg         | 0   | 0    | 0   | 0   | 0    | 0   | 0    | 0    | 0    |
| tRF-5036  | accgggatggccgagtggtta     | 0   | 0    | 0   | 0   | 0    | 0   | 0    | 0    | 0    |
| Cand5     | gccccgggcctatcctagaa      | 0   | 1    | 0   | 0   | 1    | 0   | 0    | 0    | 2    |
| isoform a | gccccgggcctatcctagaaa     | 0   | 0    | 0   | 0   | 2    | 0   | 0    | 0    | 2    |
| Cand10    | catgtcccctgttcgggcgcca    | 0   | 0    | 0   | 0   | 0    | 0   | 0    | 0    | 0    |
| isoform a | tcatgtcccctgttcgggcgcca   | 0   | 0    | 0   | 1   | 0    | 0   | 0    | 0    | 1    |
| Cand27    | ctcctggctggctcgcca        | 1   | 4    | 0   | 0   | 1    | 0   | 0    | 0    | 6    |
| isoform a | tcgactcctggctggctcgcca    | 0   | 1    | 0   | 0   | 1    | 0   | 0    | 0    | 2    |
| isoform b | actcctggctggctcgcca       | 0   | 0    | 0   | 0   | 1    | 0   | 0    | 0    | 1    |
| Cand33    | cgtttccccggcccatgcacca    | 0   | 17   | 0   | 0   | 10   | 0   | 0    | 0    | 27   |
| Cand42    | acatgggtggttcagtggtaga    | 0   | 0    | 0   | 0   | 0    | 0   | 0    | 0    | 0    |
| isoform a | catgggtggttcagtggtaga     | 0   | 0    | 0   | 0   | 1    | 0   | 0    | 0    | 1    |
| isoform b | catgggtggttcagtggtagaattc | 0   | 0    | 0   | 1   | 0    | 0   | 0    | 0    | 1    |
|           |                           | 293 | 1065 | 244 | 673 | 2275 | 673 | 2275 | 2232 | 2232 |

**Supplemental Table 3. tRNA genes able to produce tRF-3019**

BLAST search

Genomic tRNA database (<http://gtrnadb.ucsc.edu>)

Query: atccccggacgagccc (tRF-3019 lacking 3'CCA)

chr14.trna3-ProTGG (20171005-20171076) Pro (TGG) 72 bp  
chr11.trna12-ProTGG (75624588-75624517) Pro (TGG) 72 bp  
chr5.trna14-ProTGG (180548531-180548460) Pro (TGG) 72 bp  
chr16.trna8-ProTGG (3178095-3178166) Pro (TGG) 72 bp  
chr16.trna3-ProTGG (3148924-3148995) Pro (TGG) 72 bp  
chr16.trna28-ProTGG (3174205-3174134) Pro (TGG) 72 bp  
chr14.trna6-ProTGG (20222015-20222086) Pro (TGG) 72 bp  
chr17.trna37-ProCGG (8066947-8066876) Pro (CGG) 72 bp  
chr16.trna6-ProCGG (3162050-3162121) Pro (CGG) 72 bp  
chr1.trna52-ProCGG (165950586-165950657) Pro (CGG) 72 bp  
chr6.trna30-ProCGG (27167500-27167571) Pro (CGG) 72 bp  
chr16.trna4-ProAGG (3150387-3150481) Pro (AGG) 95 bp  
chr16.trna11-ProAGG (3181990-3182061) Pro (AGG) 72 bp  
chr7.trna2-ProAGG (128210740-128210811) Pro (AGG) 72 bp  
chr6.trna12-ProAGG (26663477-26663548) Pro (AGG) 72 bp  
chr16.trna9-ProAGG (3179635-3179706) Pro (AGG) 72 bp  
chr16.trna29-ProAGG (3172707-3172636) Pro (AGG) 72 bp  
chr14.trna23-ProAGG (20147406-20147335) Pro (AGG) 72 bp  
chr14.trna22-ProAGG (20151471-20151400) Pro (AGG) 72 bp  
chr11.trna9-ProAGG (75624205-75624276) Pro (AGG) 72 bp  
chr1.trna65-ProAGG (165951420-165951349) Pro (AGG) 72 bp
